# Supplementary material
Source: PubMed Central journal article supplement (PMC1247700)

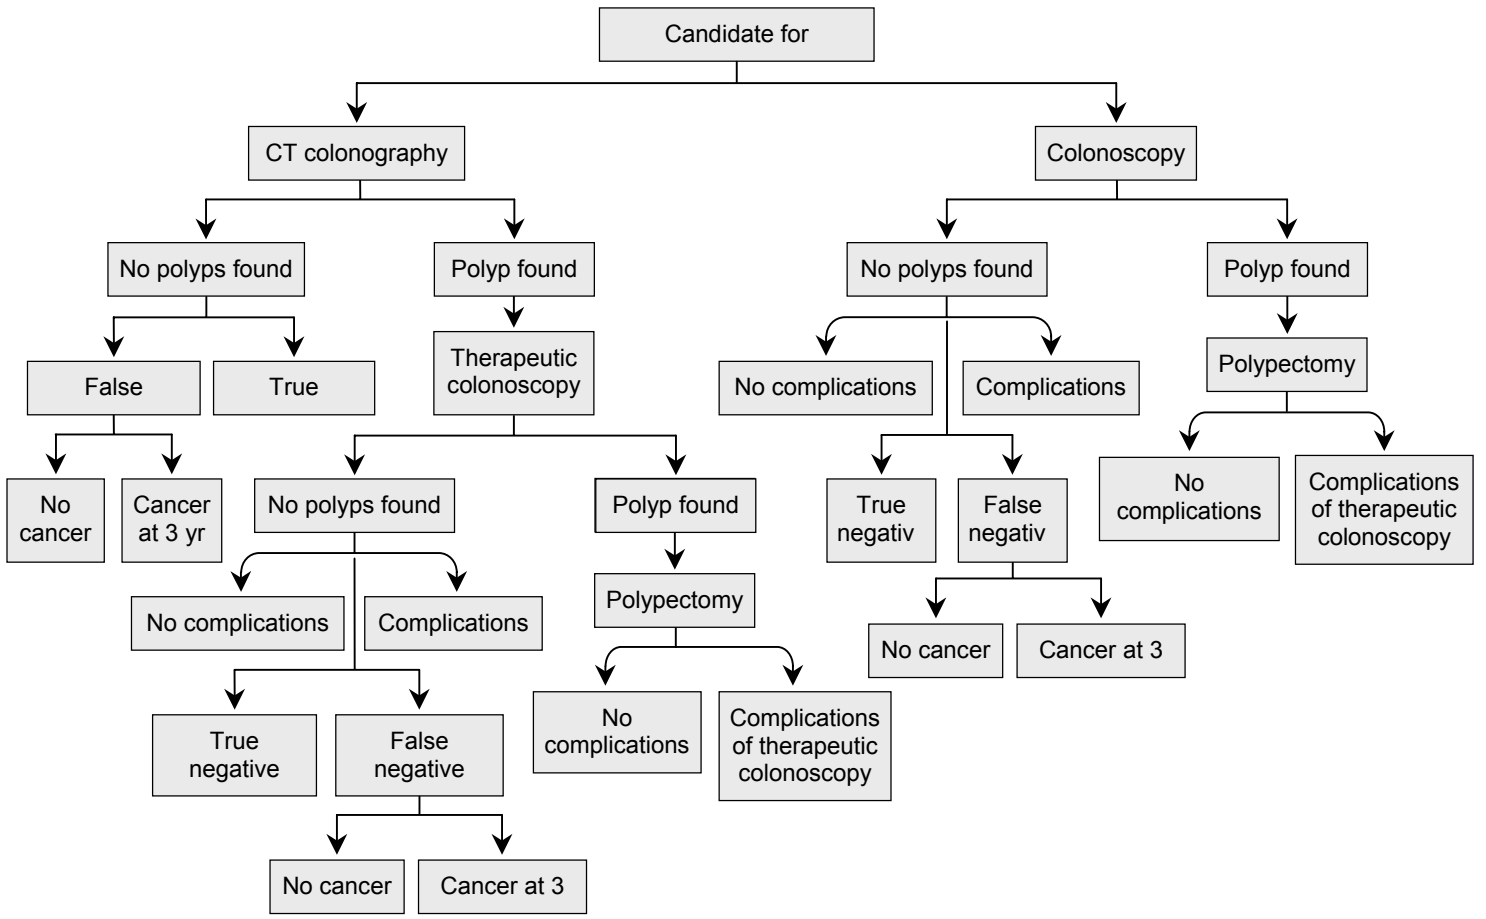

Supplement: cmaj_173_8_877__1.pdf [file cmaj_173_8_877__1.pdf]
